# Supplementary material for: Xanthatin Selectively Targets Retinoblastoma by Inhibiting the PLK1-Mediated Cell Cycle
Source: PubMed Central journal article supplement — Invest Ophthalmol Vis Sci. 2021 Dec 13;62(15):11. doi: 10.1167/iovs.62.15.11 (PMC8684308; doi:10.1167/iovs.62.15.11), 2021-12-13
Supplement: iovs-62-15-11_s001.pdf [file iovs-62-15-11_s001.pdf]

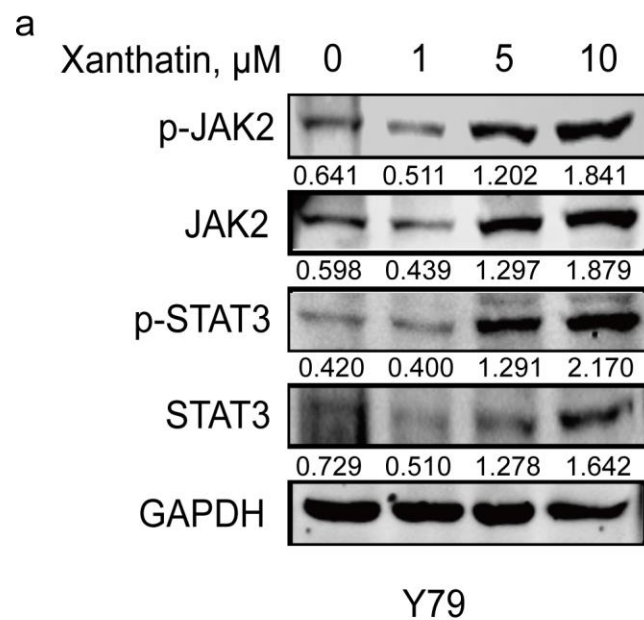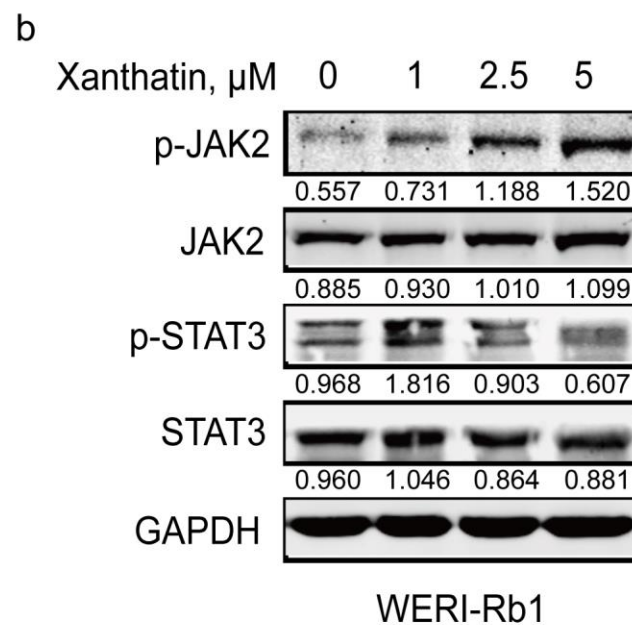

**Supplementary Figure legend**

**s-Figure 1. The STAT3-JAK2 signaling pathway was unaffected by xanthatin in retinoblastoma cells.**
